# Supplementary material
Source: Research Square preprint supplement (doi:10.21203/rs.3.rs-9862191/v1)

Graphic Abstract
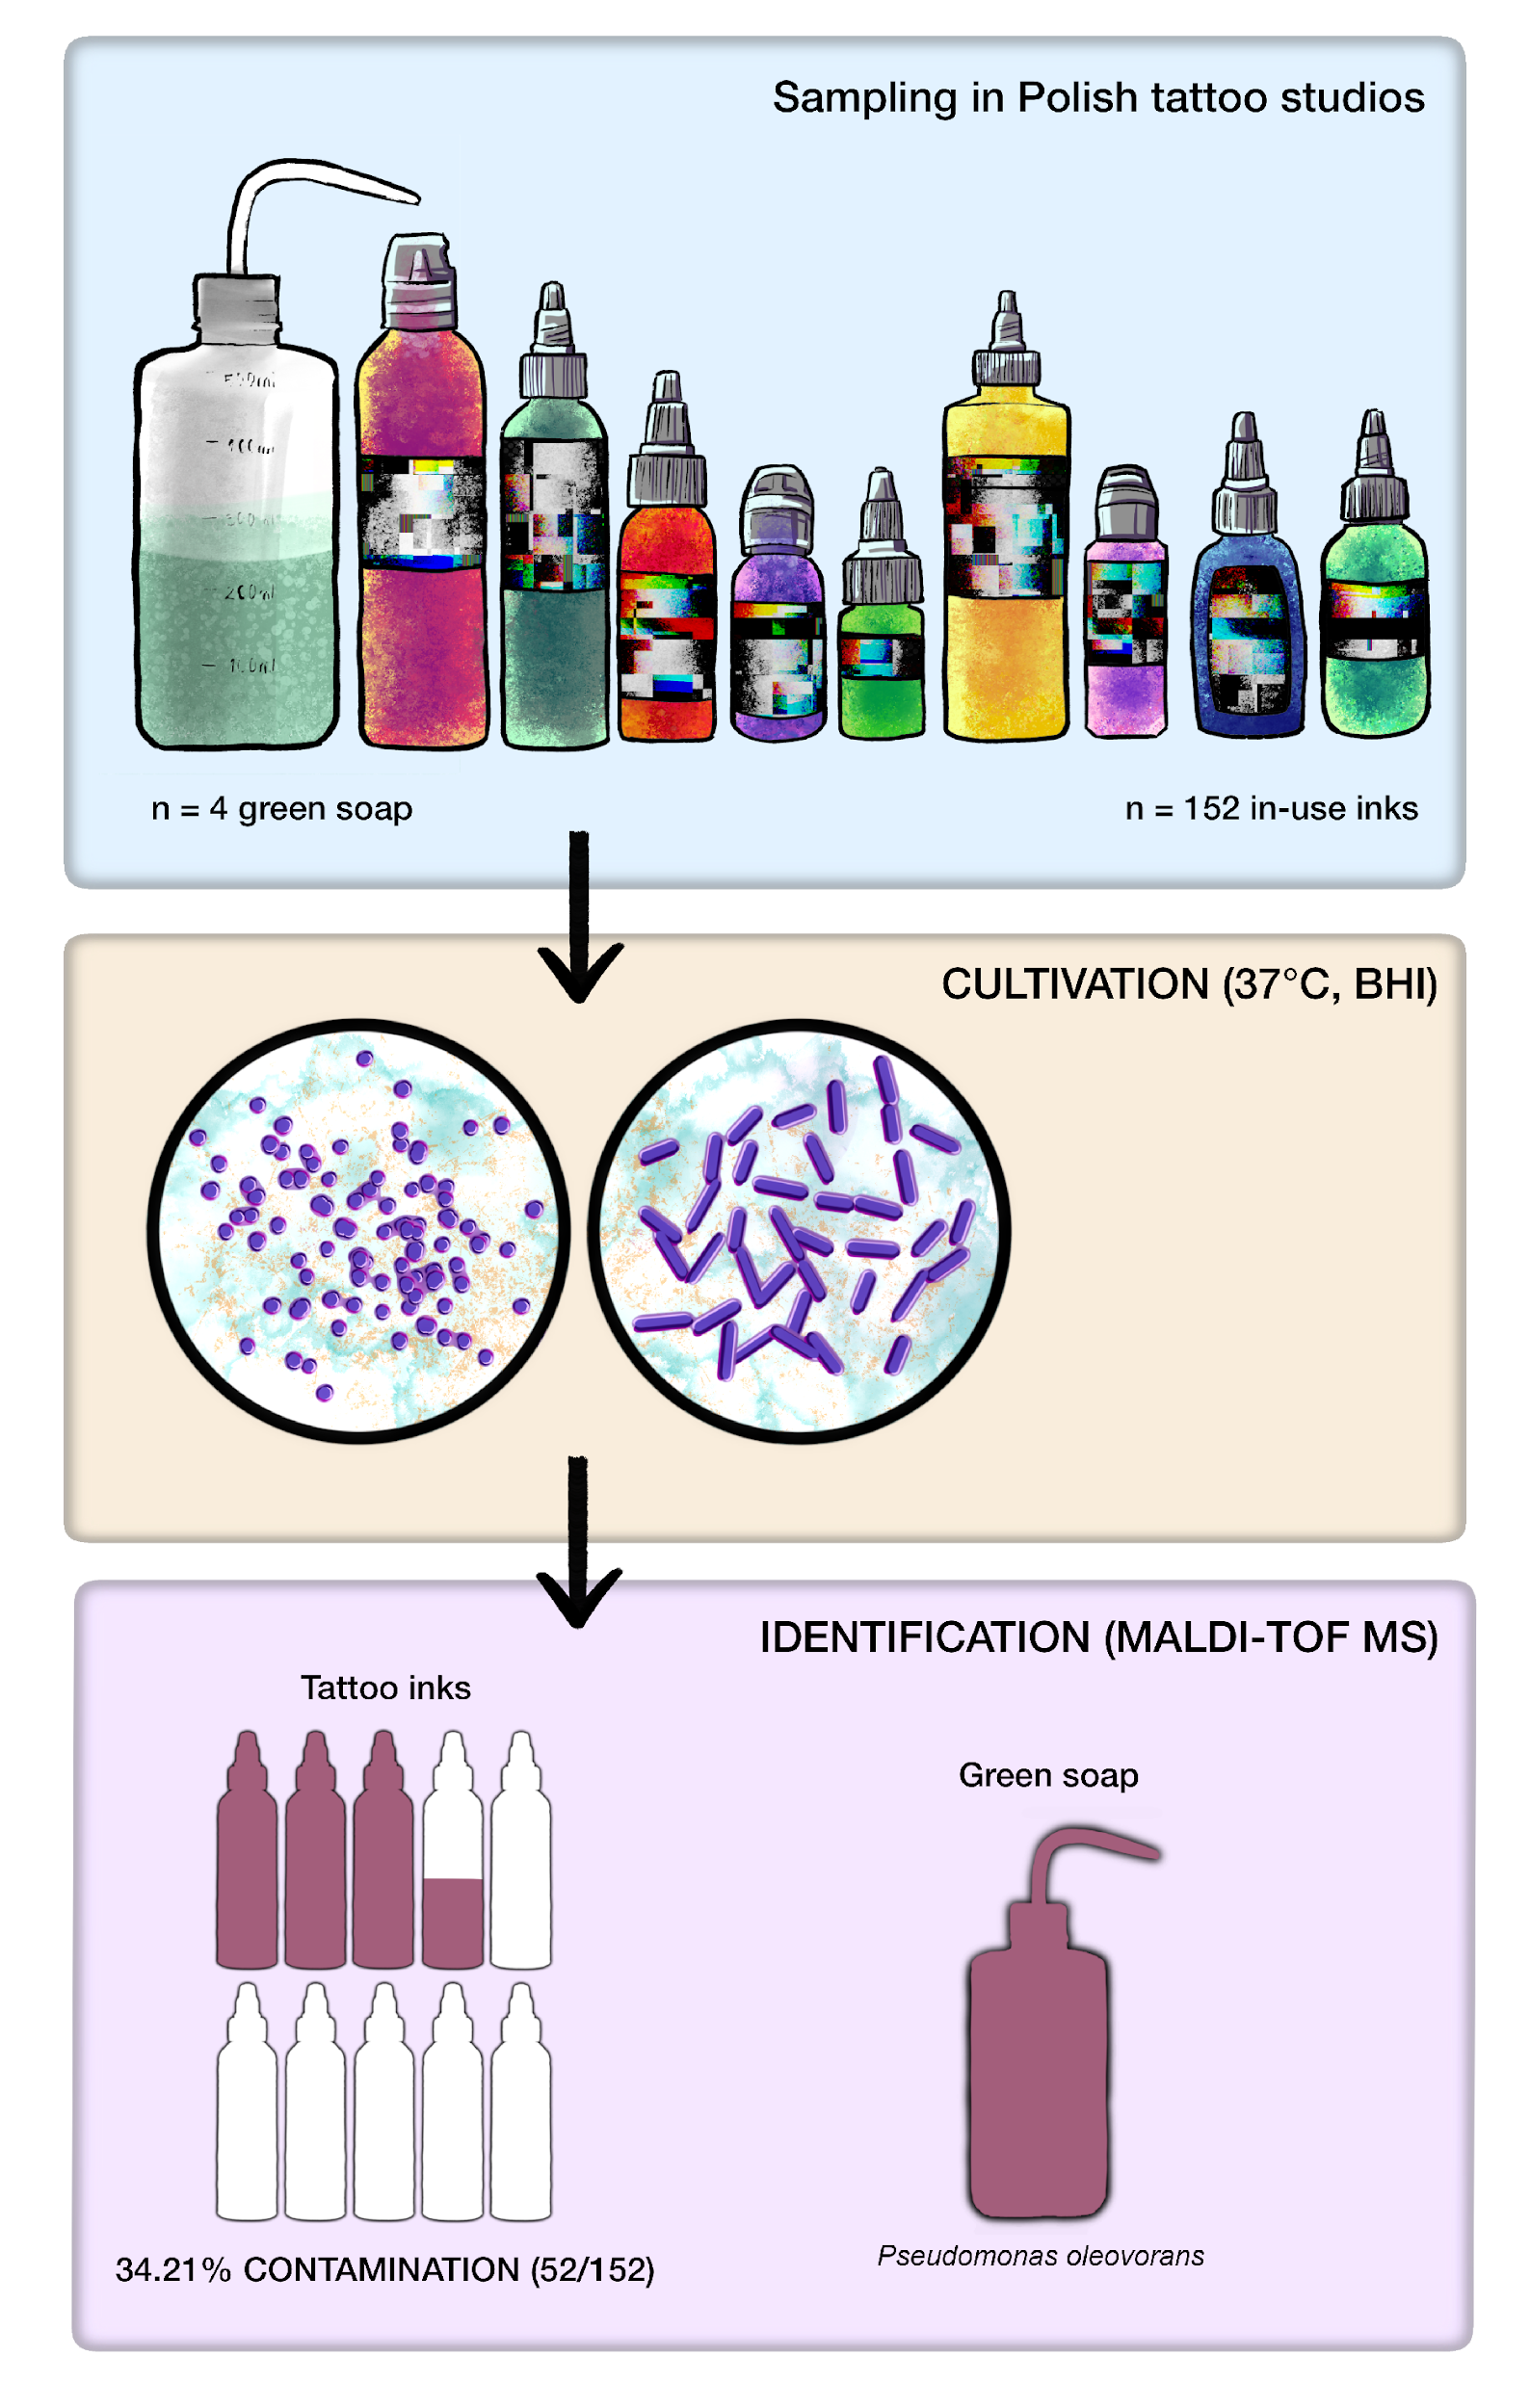

Supplement: Supplementary file 1 [file 4ce3f853aec3d3ec6b4ebc44.docx]
